# Supplementary material
Source: Springer Nature journal article supplement (https://www.springermedizin.de/resource/supplementary/12955_2013_1246_MOESM2_ESM.pdf/9559170)

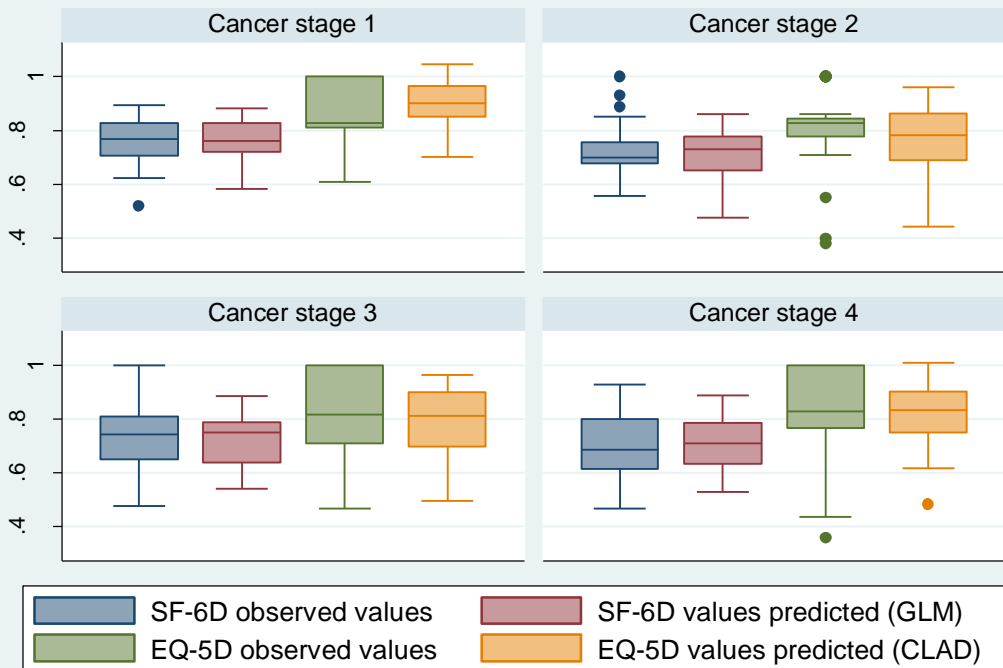

Figure 2-A Distribution of observed and predicted utility scores by cancer stage

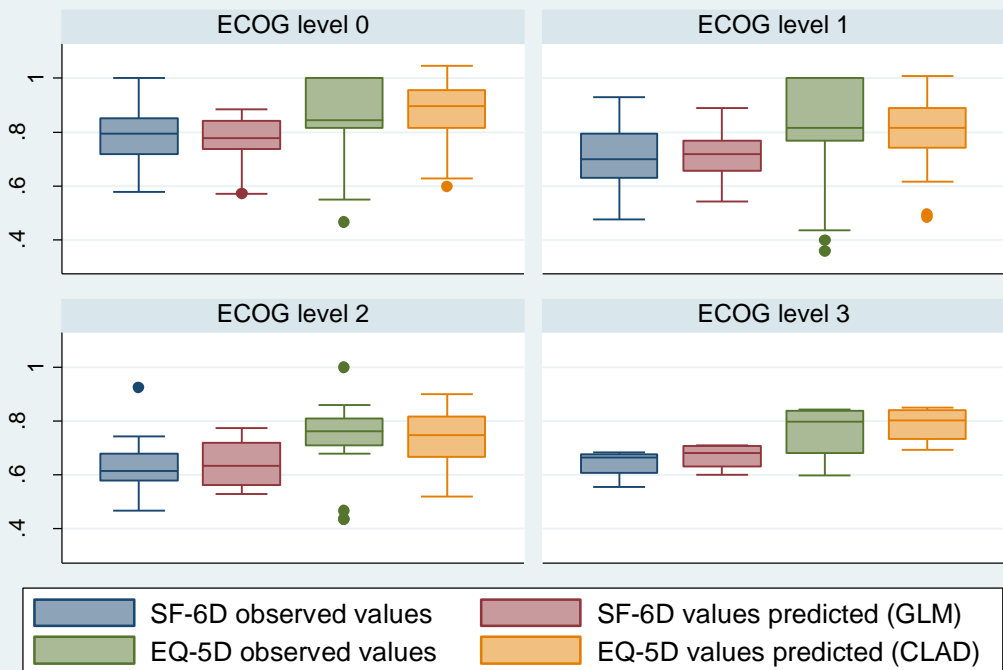

Supplement: MOESM2 [file 9559170]
